# Supplementary material
Source: PubMed Central journal article supplement (PMC3322474)

**Supplementary Figure 1. Putative CSC analysis in the panel of human colon cancer cell lines.** (A) Aldefluor activity across the panel of cell lines (DEAB is the ALDH inhibitor used as a gating control), and (B) ALDH activity following IGF-1 treatment,

**Supplementary Figure 2. Putative CSC analysis in the panel of human colon cancer cell lines.** (A) immunoblot analysis of P-glycoprotein and IGF-1R- $\beta$ , (B) cell surface expression of CD133 as assessed by flow cytometry, (C) side population analysis and CD133 cell-surface expression in live DLD1 cells (upper panel) and immunoblot analysis of CD133 in sorted SP and non-SP cells (lower panel), and (D) mitoxantrone efflux assay in RKO, SW480, and DLD1 cells under control (FBS cultures), SFM (serum starved), or IGF (serum starved cells treated with IGF-1 at 100 ng/ml for 24 hours).

**Supplementary Figure 3. IGF-1 enrichment of putative CSCs is dependent on  $\beta$ -catenin but independent of MAPK activity.** (A) pBabe and CA-Akt cells transfected with  $\beta$ -catenin siRNA followed by serum starvation and IGF-1 treatment at 100ng/ml for 24 hours (all values normalized to serum starved levels to rule out the effect of CA-Akt and  $\beta$ -catenin), and (B) side population analysis of DLD1 and SW480 cells pretreated with PD-098,059 (10  $\mu$ M) prior to IGF-1 at 100ng/ml for 24 hours (all values were normalized to control in the absence of IGF-1 to compare IGF-1 enrichment. Note:PD-098,059 alone caused a 10-20% decrease in the SP fraction).

**Supplementary Figure 4. In vivo delivery of CP-751,871 to subcutaneous tumors and decreased ALDH+ cells.** (A) immunohistochemistry of human IgG levels in tumors (top row SW480, bottom row HCT-116) from mice treated with PBS or CP-751,871

(counterstained with hematoxylin), and **(B)** immunohistochemical staining of ALDH1 in HT29 tumors (counterstained with hematoxylin).

**A**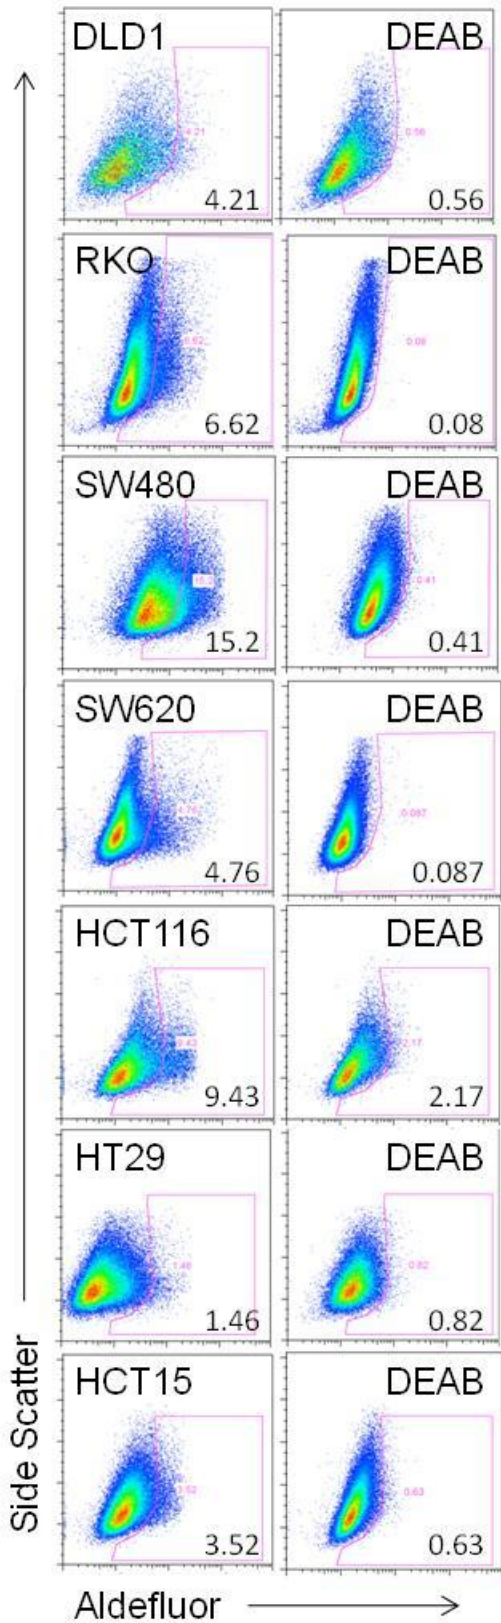**B**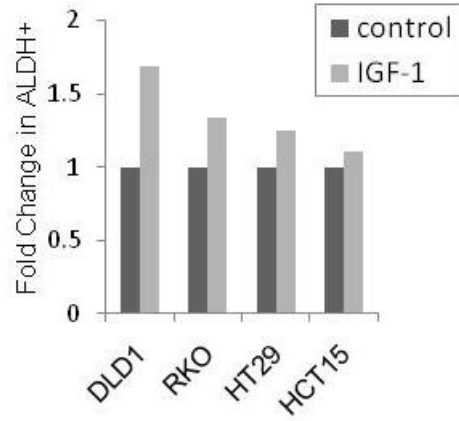

Supplementary Figure 1

**A**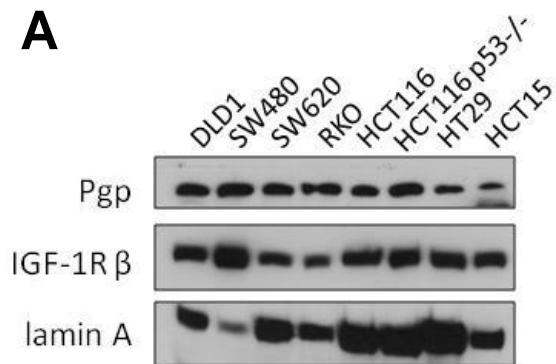**B**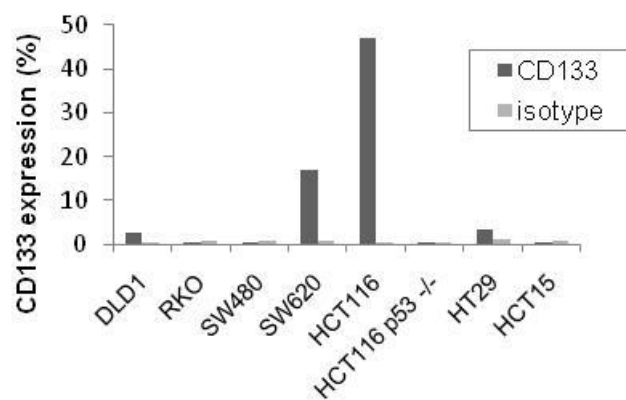**C**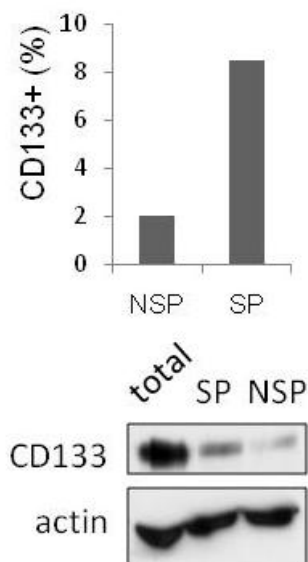**D**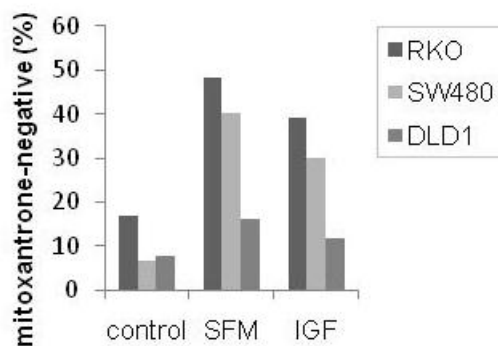

**A**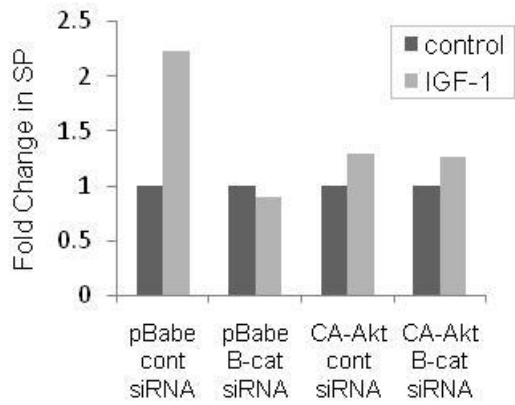**B**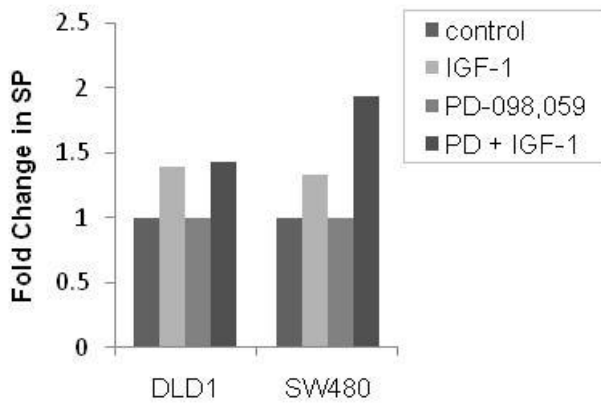

**A**

PBS

CP-751,871

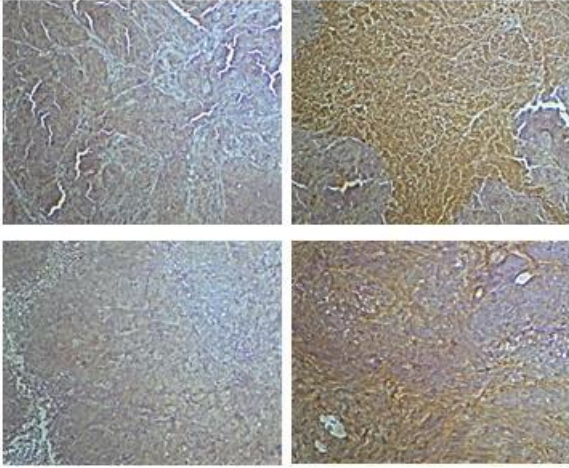**B**

isotype

ALDH

PBS

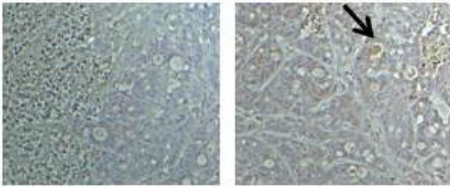

CP

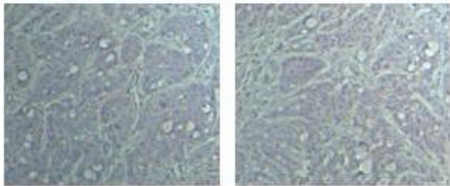

Supplement: cc1014_2331SD1.pdf [file cc1014_2331SD1.pdf]
